# Supplementary material
Source: HighWire-hosted journal article supplement (http://www.cmaj.ca/highwire/filestream/73936/field_highwire_adjunct_files/3/190366-res-4-at.pdf)

**Appendix 4 (as supplied by the authors):** Figure S3. Temporal trends in obstetric anal sphincter injury stratified by parity, obstetric history and episiotomy among nulliparous women (panel A), among parous women without a previous cesarean delivery (panel B), and among women with a vaginal birth after cesarean (panel C) among singleton term deliveries, Canada, 2004-2014. VBAC denotes vaginal birth after cesarean (VBAC); SVD denotes spontaneous vaginal delivery; CD denotes cesarean delivery.

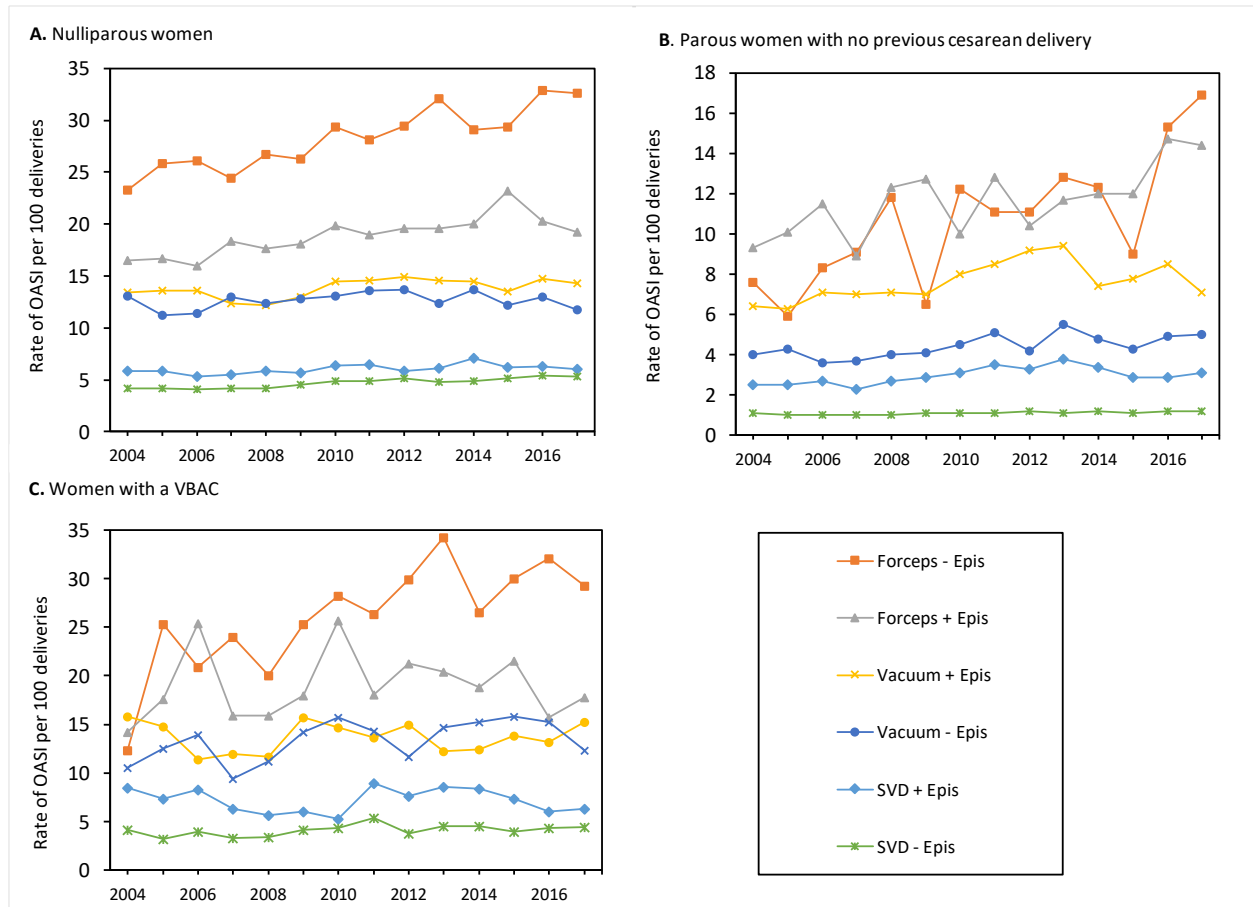

Supplement: 190366-res-4-at.pdf [file 190366-res-4-at.pdf]
